# Supplementary material for: Association between different types of physical activities and arthritis among Chinese elderly: evidence from the China health and retirement longitudinal study
Source: Research Square preprint supplement (doi:10.21203/rs.3.rs-3890440/v1), 2024-02-13
Supplement: Supplementary file 1 [file a2fb11087e3fbb6ee1aea2f7.xlsx]

## Sheet: Sheet1
Table 2 Subgroup analysis of the arthritis incidence with different levels of physical activity
Characteristics	arthritis incidence with different levels of physical activity N (%)			χ2	p-value
	Light	Moderate	Vigorous
Full sample (n = 5334)	538 (32.0%)	606 (35.0%)	721 (37.5%)	11.879	0.003
Age
45-55	145 (26.8%)	195 (30.3%)	281 (32.2%)	4.757	0.093
>55	393 (34.5%)	411 (37.7%)	440 (41.9%)	12.631	0.002
Gender
Male	196 (27.4%)	209 (29.4%)	372 (35.3%)	14.094	0.001
Female	342 (35.4%)	397 (38.9%)	349 (40.2%)	4.817	0.09
BMI
Underweight	24 (24.7%)	32 (35.2%)	44 (40.7%)	5.959	0.51
Normal	258 (32.4%)	286 (33.3%)	401 (35.0%)	1.521	0.468
Overweight or obesity	256 (32.5%)	288 (36.9%)	276 (41.3%)	12.039	0.002
Hyperlipidemia	180 (37.1%)	189 (43.2%)	163 (47.4%)	9.086	0.011
Diabetes or hyperglycemia	49 (37.4%)	45 (40.2%)	28 (50.9%)	2.965	0.227
Hypertension	180 (37.1%)	189 (43.2%)	163 (47.4%)	9.086	0.011
Stomach or other digestive disease	171 (49.7%)	227 (53.8%)	266 (53.6%)	1.604	0.448
Results are presented as N (%). p < 0.05 was considered statistically significant. BMI, body mass index.
