# Supplementary material for: Association between different types of physical activities and arthritis among Chinese elderly: evidence from the China health and retirement longitudinal study
Source: Research Square preprint supplement (doi:10.21203/rs.3.rs-3890440/v1), 2024-02-13
Supplement: Supplementary file 2 [file dba584613a4eb89ffe7449a3.xlsx]

## Sheet: Sheet1
Table 1 Comparison of baseline characteristics between the arthritis and the non-arthritis group
Characteristics	Arthritis(n=1865)	Non-arthritis(n=3469)	p-value
Age(mean ± SD)	59.86±9.040	58.78±9.542	0.015
GenderN (%)			<0.001
Male	777 (31.3%)	1704 (68.7%)
Female	1088 (38.1%)	1765 (61.9%)
BMI (mean ± SD)	23.690±3.698	23.451±3.851	0.651
Types of physical activities N (%)			0.003
Light	538(32%)	1142(68%)
Moderate	606(35%)	1126(65%)
Vigorous	721(37.5%)	1201(62.5%)
Marital status N (%)			0.108
Married	1857 (35.1%)	3441 (64.9%)
Other	8 (22.2%)	28 (77.8%)
Smoke N (%)			0.005
Still or Quit	661 (32.6%)	1365 (67.4%)
Never	1204 (36.4%)	2104 (63.6%)
Alcohol N (%)			0.329
More than once a month	442 (33.3%)	886 (66.7%)
Less than once a month	147 (35.2%)	271 (64.8%)
Never	1276 (35.6%)	2312 (64.4%)
Blood pressure(mmHg)
Systolic	131.26±21.700	130.56±21.104	0.138
Diastolic	75.94±12.014	76.09±11.924	0.705
Pulse(N/min)	72.68±10.723	72.30±10.212	0.209
Height(cm)	156.885±8.093	158.860±8.328	0.169
Weight(kg)	58.46±10.913	59.36±11.702	0.251
Hyperlipidemia N (%)			0.084
YES	188(38.5%)	300(61.5%)
NO	1677(34.6%)	3169(65.4%)
Diabetes or hyperglycemia N (%)			0.026
YES	122(40.9%)	176(59.1%)
NO	1743(34.6%)	3293(65.4%)
Physical disabilities N (%)			<0.001
YES	95(51.4%)	90(48.6%)
NO	1770(34.4%)	3379(65.6%)
Stomach or other digestive disease N (%)			<0.001
YES	664(52.6%)	598(47.4%)
NO	1199(29.5%)	2870(70.5%)
Hypertension N (%)			<0.001
YES	1333(32.8%)	2734(67.2%)
NO	532(42.0%)	735(58.0%)
Cancer or malignant tumor N (%)			0.031
YES	26(49.1%)	27(50.9%)
NO	1836(34.8%)	3436(65.2%)
Chronic lung diseases N (%)			<0.001
YES	284(33.1%)	276(66.9%)
NO	1577(34.8%)	3191(65.2%)
Heart diseases N (%)			<0.001
YES	330(50.7%)	321(49.3%)
NO	1525(32.7%)	3142(67.3%)
Liver diseases N (%)			<0.001
YES	107(50.2%)	106(49.8%)
NO	1749(34.2%)	3358(65.8%)
Stroke N (%)			0.002
YES	60(48.4%)	64(51.6%)
NO	1803(34.7%)	3400(65.3%)
Kidney disease N (%)			<0.001
YES	203(58.5%)	144(41.5%)
NO	1653(33.2%)	3319(66.8%)
Emotional, nervous, or psychiatric problems N (%)			0.012
YES	31(50.0%)	31(50.0%)
NO	1830(34.8%)	3432(65.2%)
Memory-related disease N (%)			0.043
YES	30(46.9%)	34(53.1%)
NO	1829(34.8%)	3433(65.2%)
Asthma N (%)			0.002
YES	93(45.1%)	113(54.9%)
NO	1759(34.4%)	3352(65.6%)
Fallen down N (%)			<0.001
YES	407(47.5%)	450(52.5%)
NO	1458(32.6%)	3017(67.4%)
Hip fracture N (%)			0.155
YES	34(42.5%)	46(57.5%)
NO	1831(34.9%)	3422(65.1%)
Results are presented as mean ± SD, or N (%). p < 0.05 was considered statistically significant. BMI, body mass index.
